# Supplementary material
Source: PubMed Central journal article supplement (PMC8578710)
Supplement: mmc1.pdf [file mmc1.pdf]

Cell Reports, Volume 37

## Supplemental information

### **An airway organoid-based screen identifies a role for the HIF1 $\alpha$ -glycolysis axis in SARS-CoV-2 infection**

**Xiaohua Duan, Xuming Tang, Manoj S. Nair, Tuo Zhang, Yunping Qiu, Wei Zhang, Pengfei Wang, Yaoxing Huang, Jenny Xiang, Hui Wang, Robert E. Schwartz, David D. Ho, Todd Evans, and Shuibing Chen**

Figure S1

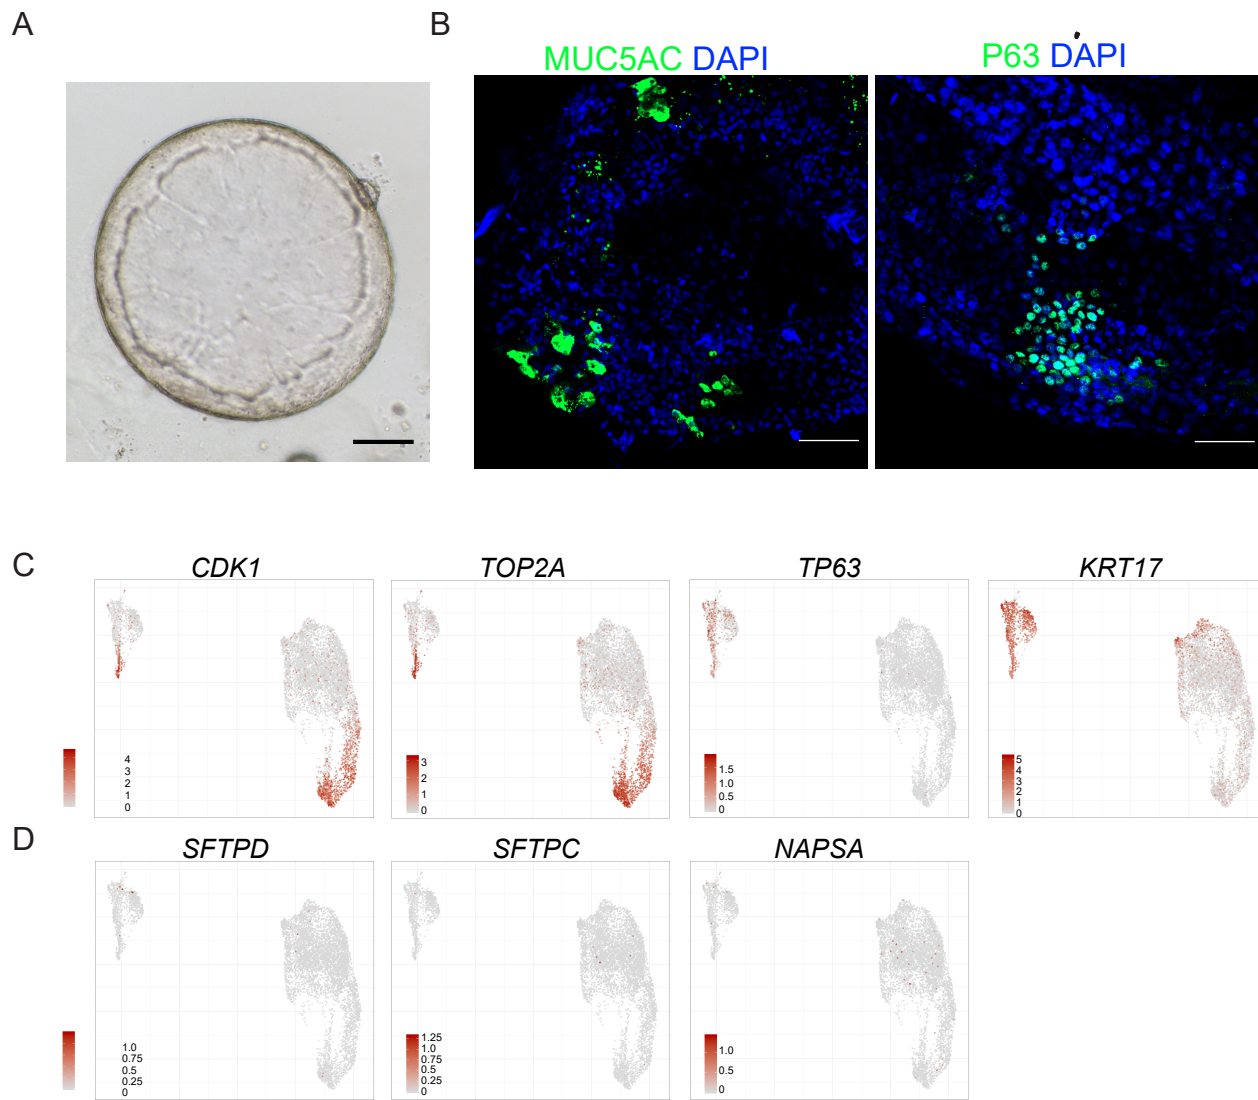

**Figure S1. Derivation and Characterization of hPSC-AOs.**

**(A)** Phase contrast image of a representative hPSC-AOs. Scale bar = 400  $\mu\text{m}$ .

**(B)** Representative confocal images of goblet cell marker MUC5AC and basal cell marker P63 in hPSC-AOs. DAPI stains nuclei. Scale bar = 100  $\mu\text{m}$ .

**(C and D)** UMAP showing the expression levels of **(C)** hPSC-AOs cell markers and **(D)** alveolar epithelial type 2 cell markers. Related to Figure 1.

Figure S2

A

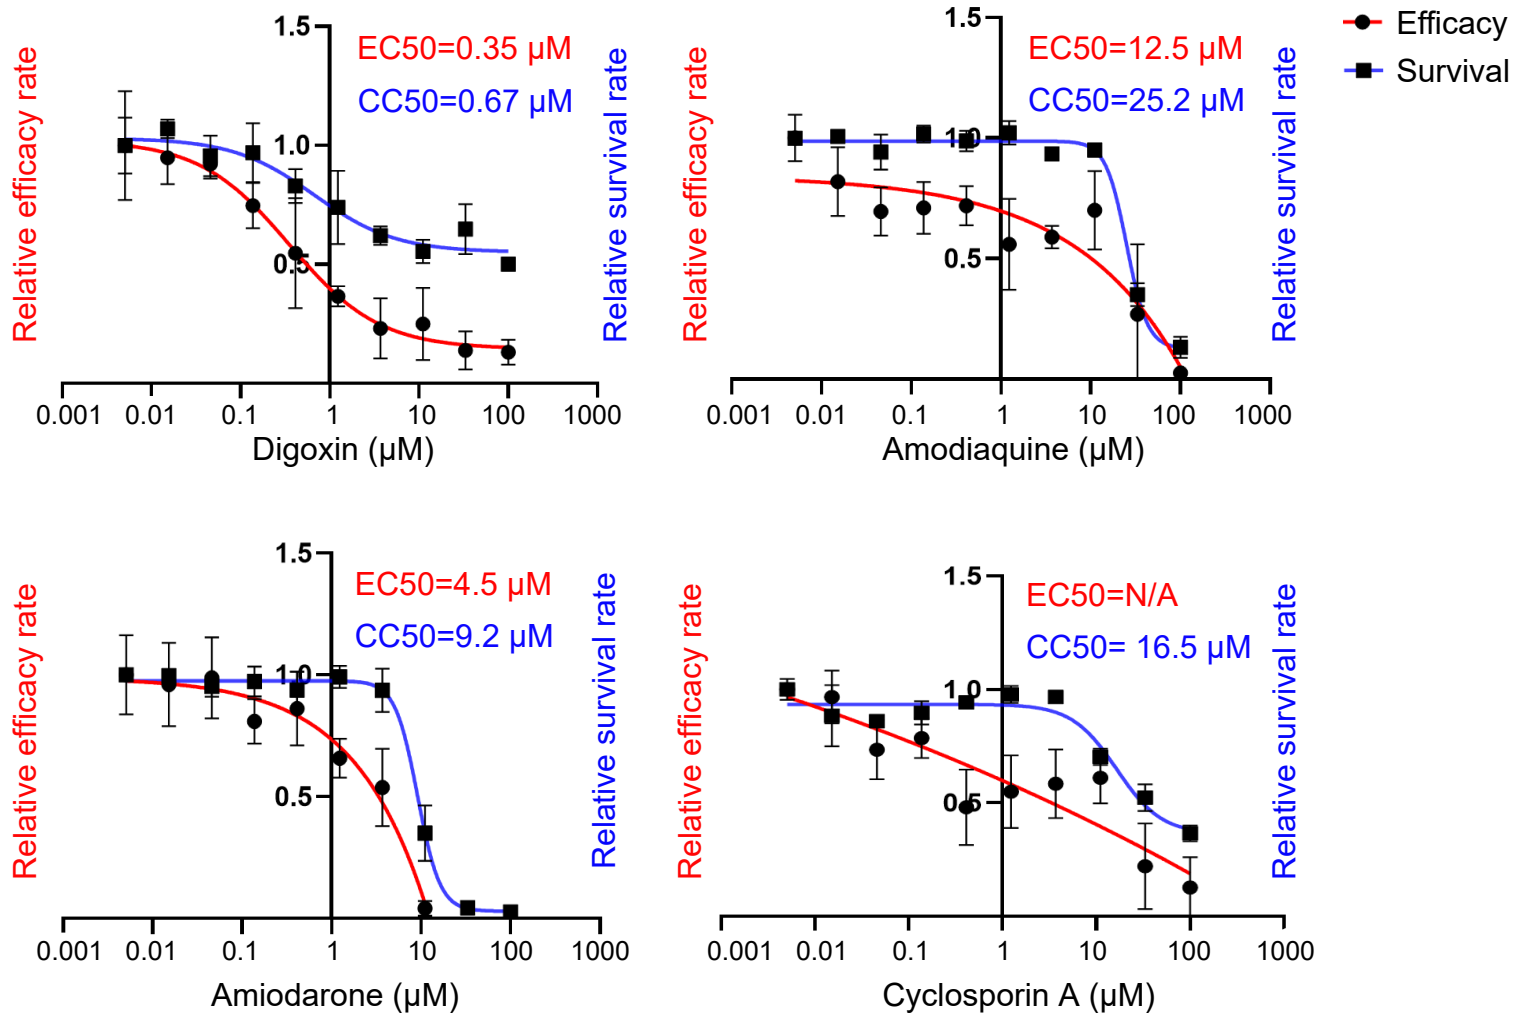

B

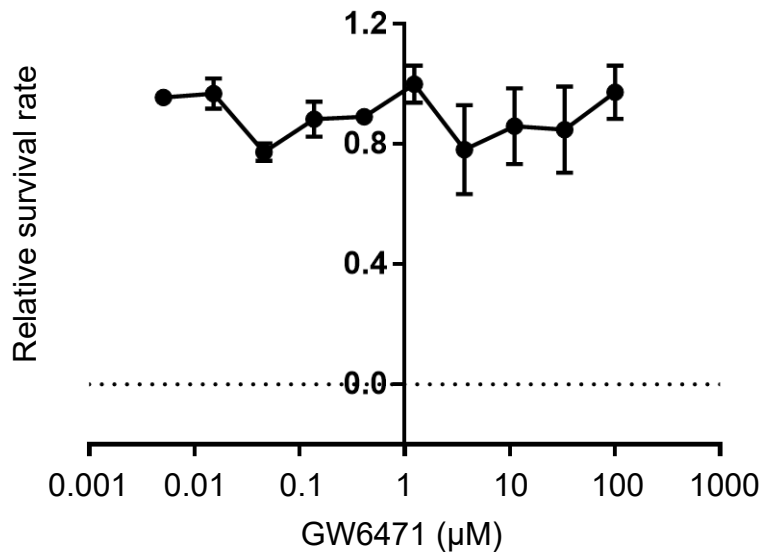



**Figure S2. Confirmation of hit compounds from high content screen.**

**(A)** Efficacy and toxicity curves of hit compounds identified from the high content screen.

**(B)** Cell survival curve of GW6471 on hPSC-AOs.

Data is presented as mean  $\pm$  SEM. N=3 biological replicates. Related to Figure 3.

**Figure S3**

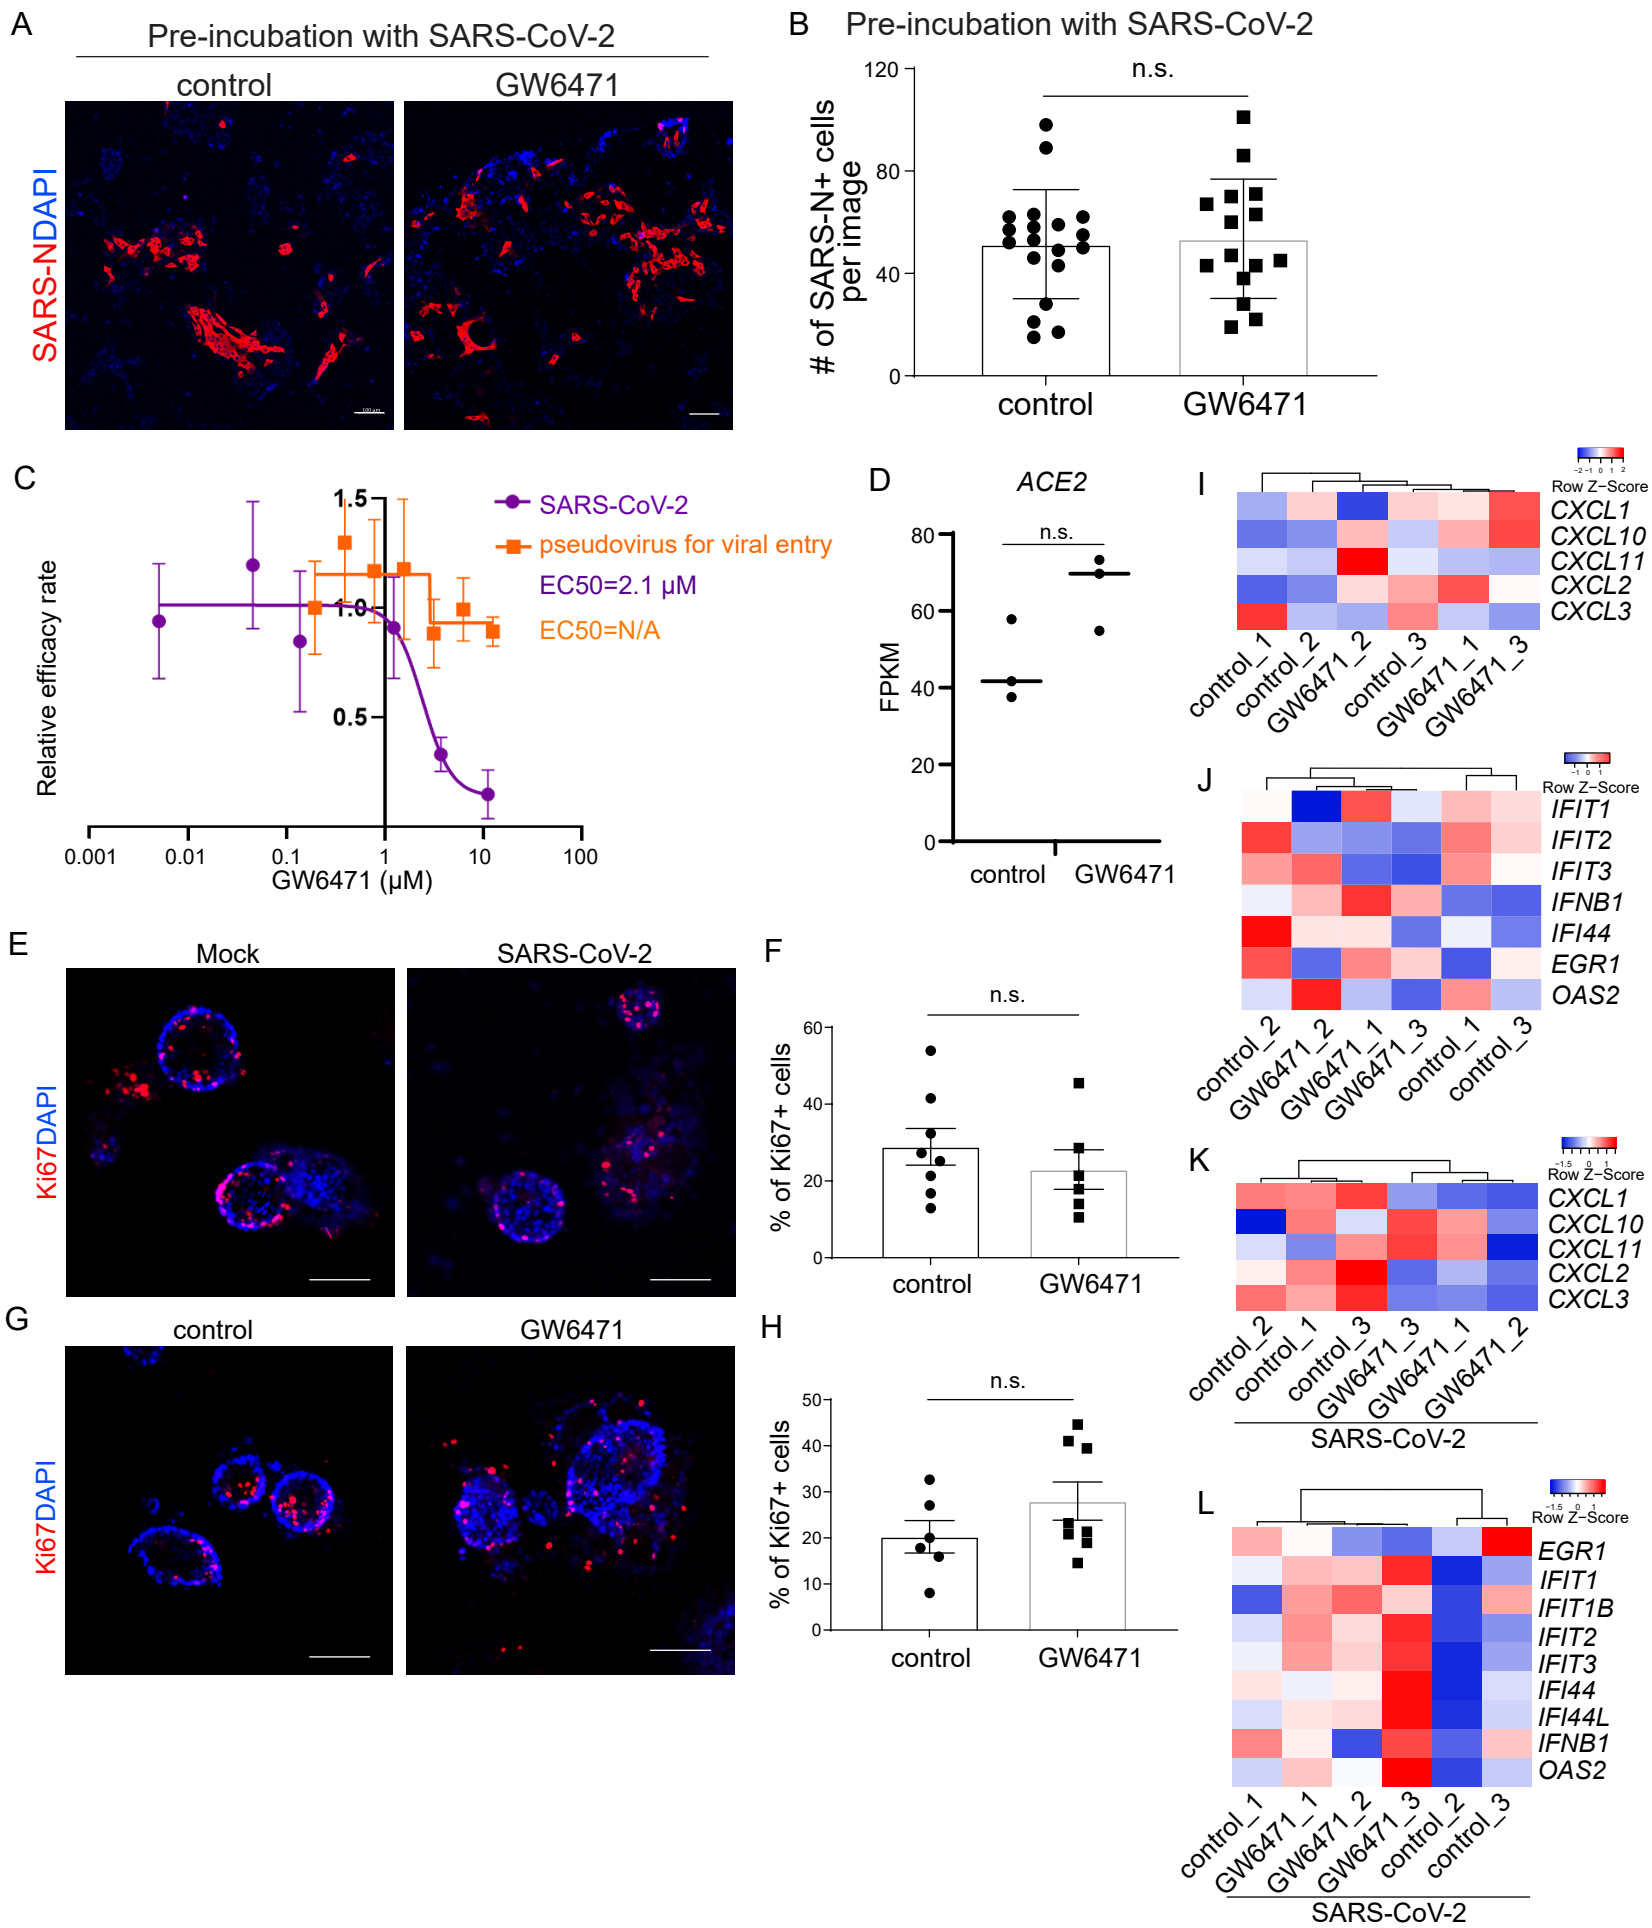

**Figure S3. The impact of GW6471 on viral cycle and host AOs.**

**(A and B)** Representative confocal images (A) and quantification (B) at 48 hpi of SARS-N<sup>+</sup> cells of hPSC-AOs, infected with SARS-CoV-2 which was pre-incubated with GW6471 or control (MOI=0.2). Scale bar = 100  $\mu$ m. Data is presented as mean  $\pm$  SEM. N=3 biological replicates.

**(C)** Efficacy curves of GW6471 on SARS-CoV-2 or pseudovirus. Data is presented as mean  $\pm$  SD. N=3 biological replicates.

**(D)** FPKM value of ACE2 of control or 10  $\mu$ M GW6471 treated hPSC-AOs at 48 hpi (MOI=0.2). Data is presented as mean  $\pm$  SD. N=3 biological replicates.

**(E and F)** Representative confocal images (E) and quantification (F) of Ki67<sup>+</sup> cells of mock or SARS-CoV-2 infected (MOI=0.2) hPSC-AOs. Scale bar = 100  $\mu$ m. Data is presented as mean  $\pm$  SEM. N=3 biological replicates.

**(G and H)** Representative confocal images (G) and quantification (H) of Ki67<sup>+</sup> cells of GW6471 or control treated hPSC-AOs (MOI=0.2). Scale bar = 100  $\mu$ m. Data is presented as mean  $\pm$  SEM. N=3 biological replicates.

**(I and K)** Heatmap of chemokine (I) and interferon (K) expression of GW6471 or control treated hPSC-AOs in the absence of SARS-CoV-2.

**(J and L)** Heatmap of chemokine (J) and interferon (L) expression of GW6471 or control treated hPSC-AOs in the presence of SARS-CoV-2 (MOI=0.2).

P values were calculated by unpaired two-tailed Student's t test.

Related to Figure 4.

**Figure S4**

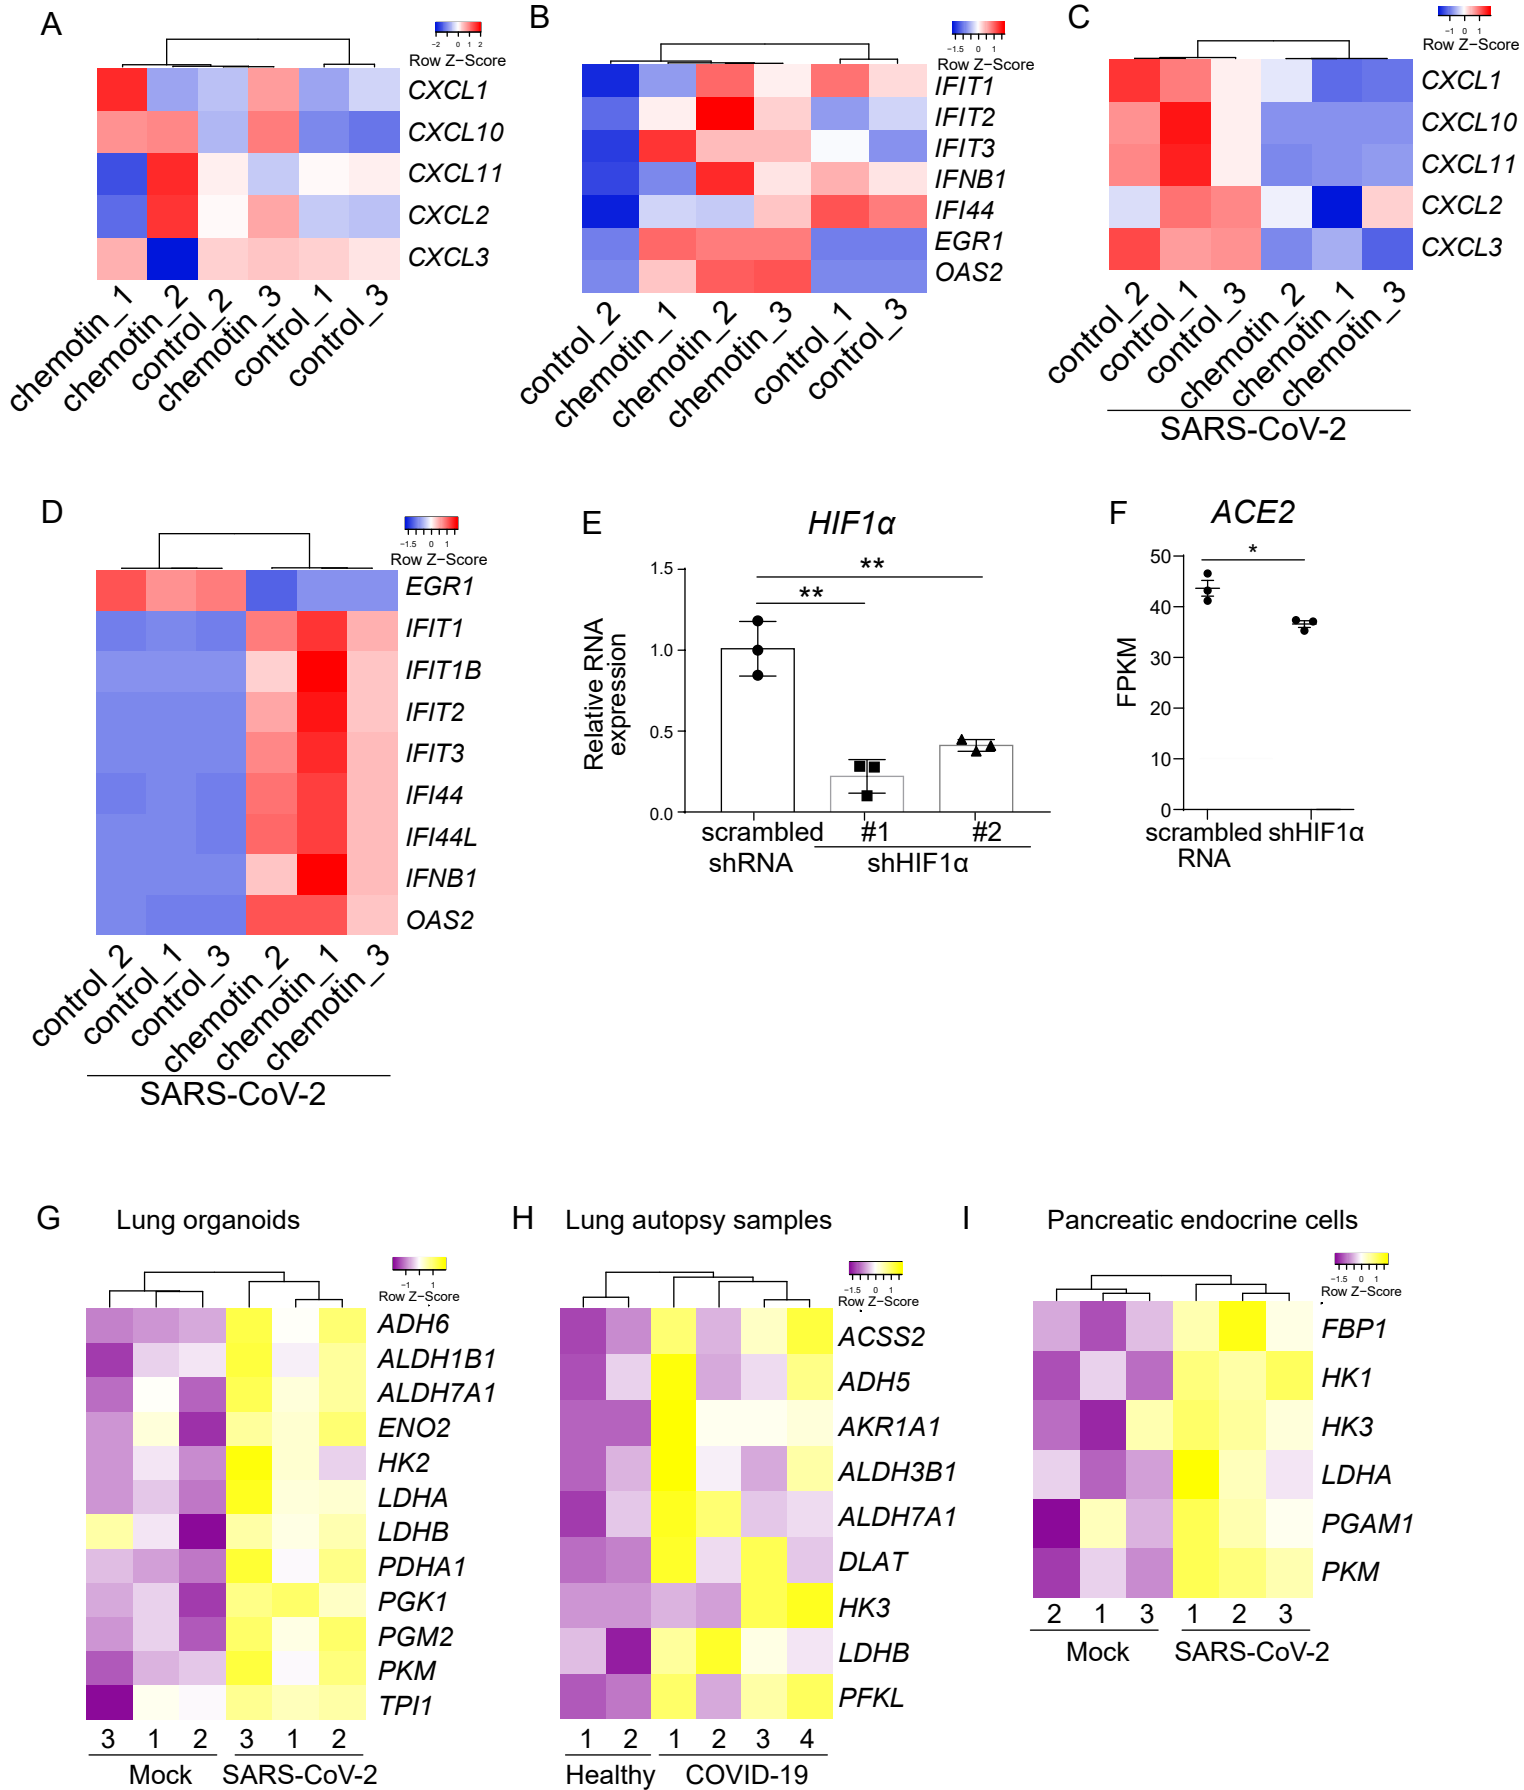

**Figure S4. RNA-seq analysis.**

**(A and B)** Heatmap of chemokine (A) and interferon (B) expression of chetomin or control treated hPSC-AOs in the absence of SARS-CoV-2.

**(C and D)** Heatmap of chemokine (C) and interferon (D) expression of chetomin or control treated hPSC-AOs in the presence of SARS-CoV-2 (MOI=0.2).

**(E)** Relative HIF1 $\alpha$  mRNA expression in hPSC-AOs expressing shHIF1 $\alpha$  or scrambled shRNA. Data is presented as mean  $\pm$  SEM. N=3 biological replicates.

**(F)** FPKM value of ACE2 of control or chetomin-treated hPSC-AOs at 48 hpi (MOI=0.2). Data is presented as mean  $\pm$  SD. N=3 biological replicates.

**(G)** Heatmap of glycolysis pathway associated genes in SARS-CoV-2 infected hPSC-lung organoids (GSE155241).

**(H)** Heatmap of glycolysis pathway associated genes in autopsy samples of COVID-19 patients (GSE155241).

**(I)** Heatmap of glycolysis pathway associated genes in SARS-CoV-2 infected pancreatic endocrine cells (GSE147903).

P values were calculated by unpaired two-tailed Student's t test. Related to Figure 4 and Figure 6.

**Table S3. shRNAs for HIF1 $\alpha$  knockdown.** Related to Figure 4.

|                     |                                      |
|---------------------|--------------------------------------|
| Scrambled shRNA     | <i>GCACTACCAGAGCTAACTCAGATAGTACT</i> |
| shHIF1 $\alpha$ _#1 | <i>AGCTTGCTCATCAGTTGCCACTTCCACAT</i> |
| shHIF1 $\alpha$ _#2 | <i>TACGTTGTGAGTGGTATTATTCAGCACGA</i> |

**Table S5. Antibodies used for immunocytochemistry.** Related to STAR\*METHODS.

| Usage               | Antibody                                                                       | Clone #    | Host   | Catalog #  | Vendor                   | Dilution |
|---------------------|--------------------------------------------------------------------------------|------------|--------|------------|--------------------------|----------|
| Immunocytochemistry | Human ACE-2 Antibody                                                           | Polyclonal | Goat   | AF933      | R&D Systems              | 1:200    |
| Immunocytochemistry | CDX2                                                                           | CDX2-88    | Mouse  | MU392 A-UC | Biogenex                 | 1:500    |
| Immunocytochemistry | Cytokeratin-20                                                                 | SPM140     | Mouse  | sc-56522   | Santa Cruz               | 1:100    |
| Immunocytochemistry | FOXJ1                                                                          | 2A5        | Mouse  | 14-9965-82 | Thermo Fisher Scientific | 1:100    |
| Immunocytochemistry | acetyl-alpha tubulin                                                           | 6-11B-1    | Mouse  | MABT868    | Sigma-Aldrich            | 1:3000   |
| Immunocytochemistry | acetyl-alpha tubulin                                                           | D20G3      | Rabbit | 5335       | Cell Signaling           | 1:3000   |
| Immunocytochemistry | MUC5AC                                                                         | 45M1       | Mouse  | MA5-12178  | Thermo Fisher Scientific | 1:100    |
| Immunocytochemistry | P63                                                                            | 4A4        | Mouse  | CM163A     | Biocare                  | 1:100    |
| Immunocytochemistry | SARS-CoV/SARS-CoV-2 Nucleocapsid Antibody                                      | R001       | Rabbit | 40143-R001 | Sino Biological          | 1:200    |
| Immunocytochemistry | Ki67 Antibody                                                                  | SP6        | Rabbit | RM-9106-S1 | Thermo Fisher Scientific | 1:500    |
| Immunocytochemistry | Donkey anti-Mouse IgG (H+L) Cross-Adsorbed Secondary Antibody, Alexa Fluor 488 | Polyclonal | Donkey | #A-21202   | Thermo Fisher Scientific | 1:500    |

|                     |                                                                               |            |        |          |                          |       |
|---------------------|-------------------------------------------------------------------------------|------------|--------|----------|--------------------------|-------|
| Immunocytochemistry | Donkey anti-Rabbit IgG (H+L) Secondary Antibody, Alexa Fluor 594              | Polyclonal | Donkey | #A-21207 | Thermo Fisher Scientific | 1:500 |
| Immunocytochemistry | Donkey anti-Goat IgG (H+L) Cross-Adsorbed Secondary Antibody, Alexa Fluor 647 | Polyclonal | Donkey | #A-21447 | Thermo Fisher Scientific | 1:500 |
| Immunocytochemistry | Donkey anti-Goat IgG Secondary Antibody, Alexa Fluor 594                      | Polyclonal | Donkey | A32816   | Thermo Fisher            | 1:500 |
| Immunocytochemistry | Donkey anti-Rabbit IgG Secondary Antibody, Alexa Fluor 647                    | Polyclonal | Donkey | A32795   | Thermo Fisher            | 1:500 |



**Table S6. Primers used for qRT-PCR. Related to STAR\*METHODS.**

| <b>Primer name</b>                     | <b>Sequence</b>                      |
|----------------------------------------|--------------------------------------|
| <i>ACTB-Forward</i>                    | <i>CGTCACCAACTGGGACGACA</i>          |
| <i>ACTB-Reverse</i>                    | <i>CTTCTCGCGGTTGGCCTTGG</i>          |
| <i>SARS-CoV-2-TRS-L</i>                | <i>CTCTTG TAGATCTGTTCTCTAAACGAAC</i> |
| <i>SARS-CoV-2-TRS-N</i>                | <i>GGTCCACCAAACGTAATGCG</i>          |
| <i>HIF1<math>\alpha</math>-Forward</i> | <i>TATGAGCCAGAAGAACTTTTAGGC</i>      |
| <i>HIF1<math>\alpha</math>-Reverse</i> | <i>CACCTCTTTTGGCAAGCATCCTG</i>       |
